# Supplementary material
Source: PubMed Central journal article supplement (PMC4671271)
Supplement: NIHMS739106-supplement-Supplemental_table.pdf [file NIHMS739106-supplement-Supplemental_table.pdf]

**Supplementary Table 1. *Items used to assess childhood abuse history from the Childhood Trauma Questionnaire - short form***

---

**Emotional abuse**

Someone in my family yelled and screamed at me.

People in my family said hurtful or insulting things to me.

**Physical abuse**

People in my family hit me so hard that it left me with bruises and marks.

The punishments I received seemed cruel.

I was punished with a belt, a cord, or some other hard object.

**Sexual abuse**

I believe that I was sexually abused by someone in my family.

Someone molested me in the family.

---

Items were rated as 0 ('never'), 1 ('rarely'), 2 ('sometimes'), 3 ('often'), or 4 ('very often').
